# Supplementary material for: Combined PLT and NE to predict the prognosis of patients with locally advanced cervical cancer
Source: PubMed Central journal article supplement (PMC7343858; doi:10.1038/s41598-020-66387-x), 2020-07-08
Supplement: 41598_2020_66387_MOESM1_ESM.pdf [file 41598_2020_66387_MOESM1_ESM.pdf]

## **Supplementary Information**

### **Combined PLT and NE to predict the prognosis of patients with locally advanced cervical cancer**

Han Wang<sup>1&</sup>, Wen-Ming Chen<sup>2&</sup>, Yong-Heng Zhou<sup>1&</sup>, Jian-Ping Shi<sup>3</sup>, Yue-qing Huang<sup>4</sup>, Wen-Jie Wang<sup>3\*</sup>

<sup>1</sup>Department of Oncology, Jining Cancer Hospital, Jining, Shandong, 272000, P.R. China

<sup>2</sup>Department of Oncology, Jining No. 1 People's Hospital; Affiliated Jining NO.1 People's Hospital of Jining Medical University, Jining, Shandong, 272011, P.R. China.

<sup>3</sup>Department of Radio-Oncology, The Affiliated Suzhou Hospital of Nanjing Medical University, Suzhou, Jiangsu, 215001, P.R. China

<sup>4</sup>Department of General Practice, The Affiliated Suzhou Hospital of Nanjing Medical University, Suzhou, Jiangsu 215001, P. R. China

&Authors contributed equally to this work

\*Corresponding to:

Wen-Jie Wang M.D., E-mail: suda\_wangwenjie@163.com, Department of Radio-Oncology, the Affiliated Suzhou Hospital of Nanjing Medical University, Suzhou, Jiangsu 215001, P.R. China

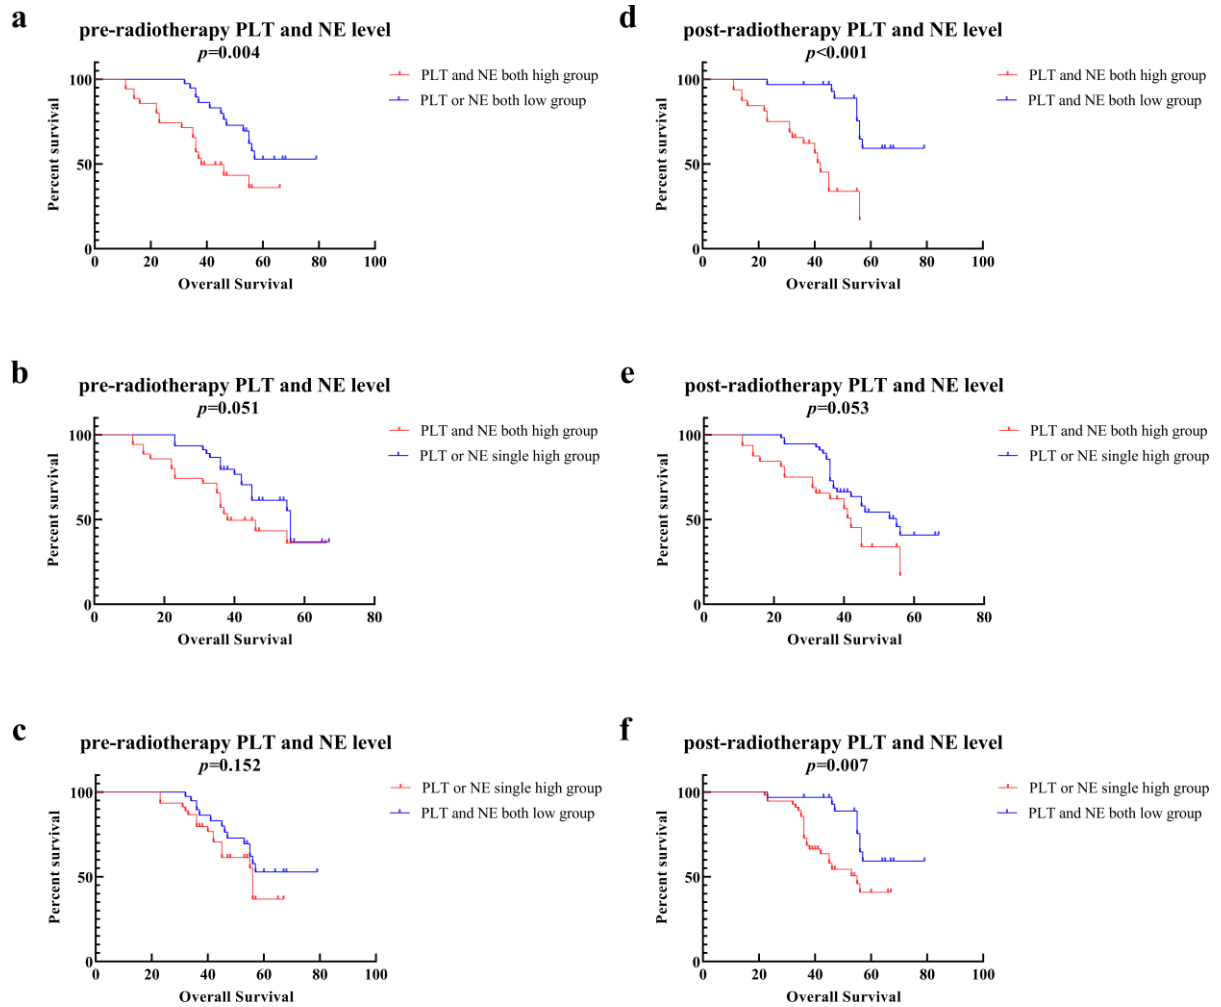

**Supplementary Figure S1. The relationships between different groups of PLT and NE levels according to pre-radiotherapy and post-radiotherapy with overall survival (OS).**

- (a) The OS between pre-radiotherapy PLT and NE both high group with PLT and NE both low group.
- (b) The OS between pre-radiotherapy PLT and NE both high group with PLT or NE single high group.
- (c) The OS between pre-radiotherapy PLT and NE single high group with PLT and NE both low group.
- (d) The OS between post-radiotherapy PLT and NE both high group with PLT and NE both low group.
- (e) The OS between post-radiotherapy PLT and NE both high group with PLT or NE single high group.
- (f) The OS between post-radiotherapy PLT and NE single high group with PLT and NE both low group.
